# Supplementary material
Source: PubMed Central journal article supplement (PMC3459485)
Supplement: 12_010_Bobustuc.suppl.pdf [file 12_010_Bobustuc.suppl.pdf]

## MGMT Inhibition Restores ER $\alpha$ Functional Sensitivity to Antiestrogen Therapy

George C Bobustuc,<sup>1,2,3,4</sup> Joshua S Smith,<sup>1</sup> Sreeram Maddipatla,<sup>1</sup> Sheila Jeudy,<sup>1</sup> Arati Limaye,<sup>1</sup> Beth Isley,<sup>1</sup> Maria-Lourdes M Caparas,<sup>1</sup> Susan M Constantino,<sup>1</sup> Nikita Shah,<sup>1,3</sup> Cheryl H Baker,<sup>2</sup> Kalkunte S Srivenugopal,<sup>5</sup> Said Baidas,<sup>1,3</sup> and Santhi D Konduri<sup>1,3</sup>

Online address: <http://www.molmed.org>

The Feinstein Institute for Medical Research 

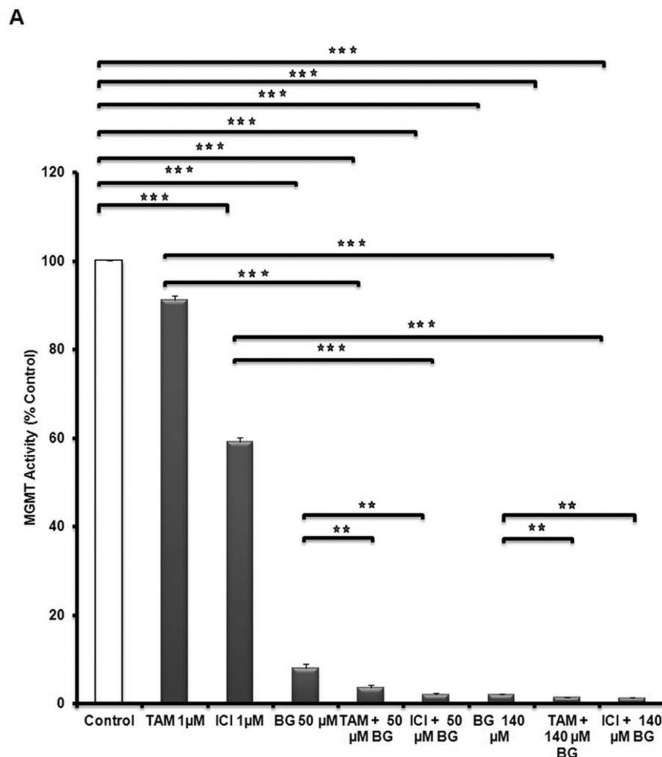

**Supplementary Figure S1.** Benzylguanine inhibits tamoxifen-resistant breast cancer growth in an MGMT independent manner. Tamoxifen-resistant MCF7 breast cancer cells were treated with BG (50 or 140  $\mu$ mol/L) for 24 h before TAM/ICI was added for 48 h before MGMT activity assay was performed. (A) BG (50 or 140  $\mu$ mol/L) led to significant decrease in MGMT activity which was decreased further when combination therapy (TAM + BG/ICI + BG) was used. (B) Tamoxifen-resistant MCF7 cells were transfected with NT siRNA or MGMT siRNA and 24h post transfection BG (50 or 140  $\mu$ mol/L) was added for another 48 h before ATP assays were performed. BG (50  $\mu$ mol/L) did not inhibit tamoxifen-resistant MCF7 cell growth whereas BG (140  $\mu$ mol/L) showed 50% growth inhibition. Addition of BG (140  $\mu$ mol/L) to MGMT siRNA showed an enhancement of growth inhibition over MGMT siRNA alone. (C) BG (50  $\mu$ mol/L) did not have any growth inhibitory effect either alone or in combination with TAM/ICI. BG (140  $\mu$ mol/L) either alone or in combination with TAM/ICI significantly decreased tamoxifen-resistant breast cancer cell growth.

*Continued*

B

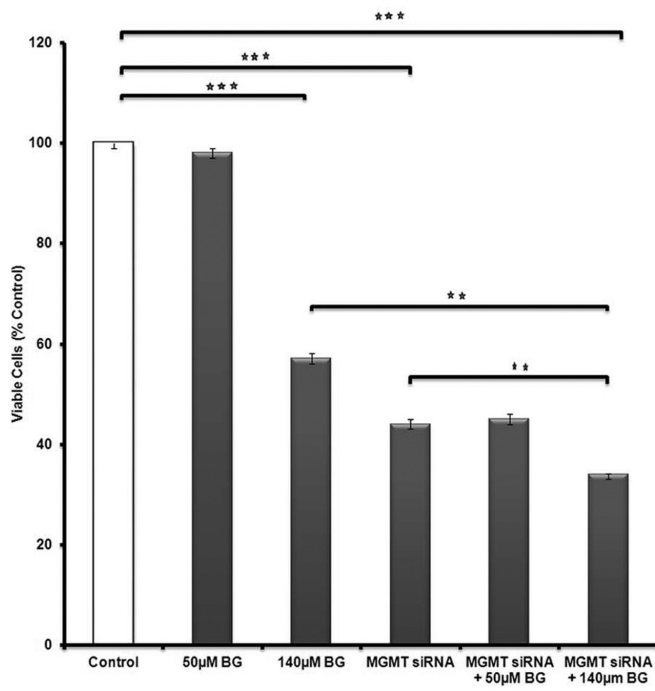

C

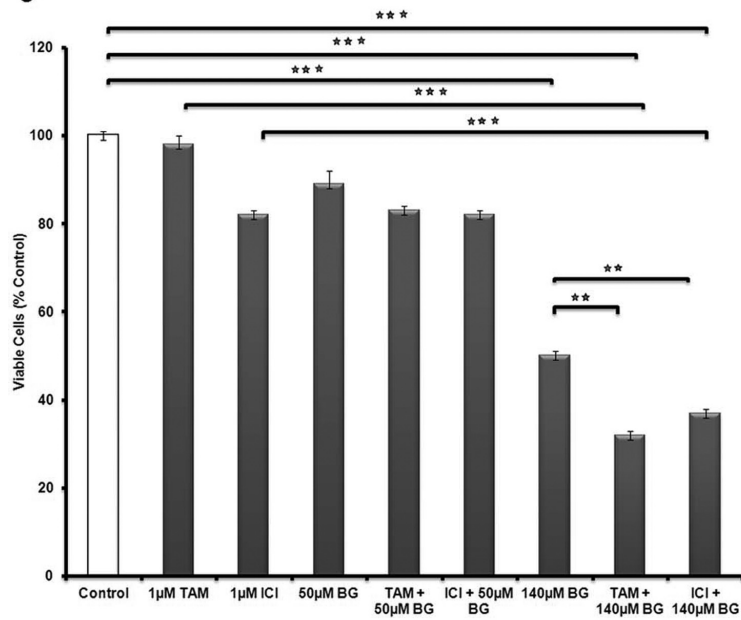

Supplementary Figure S1. *Continued.*

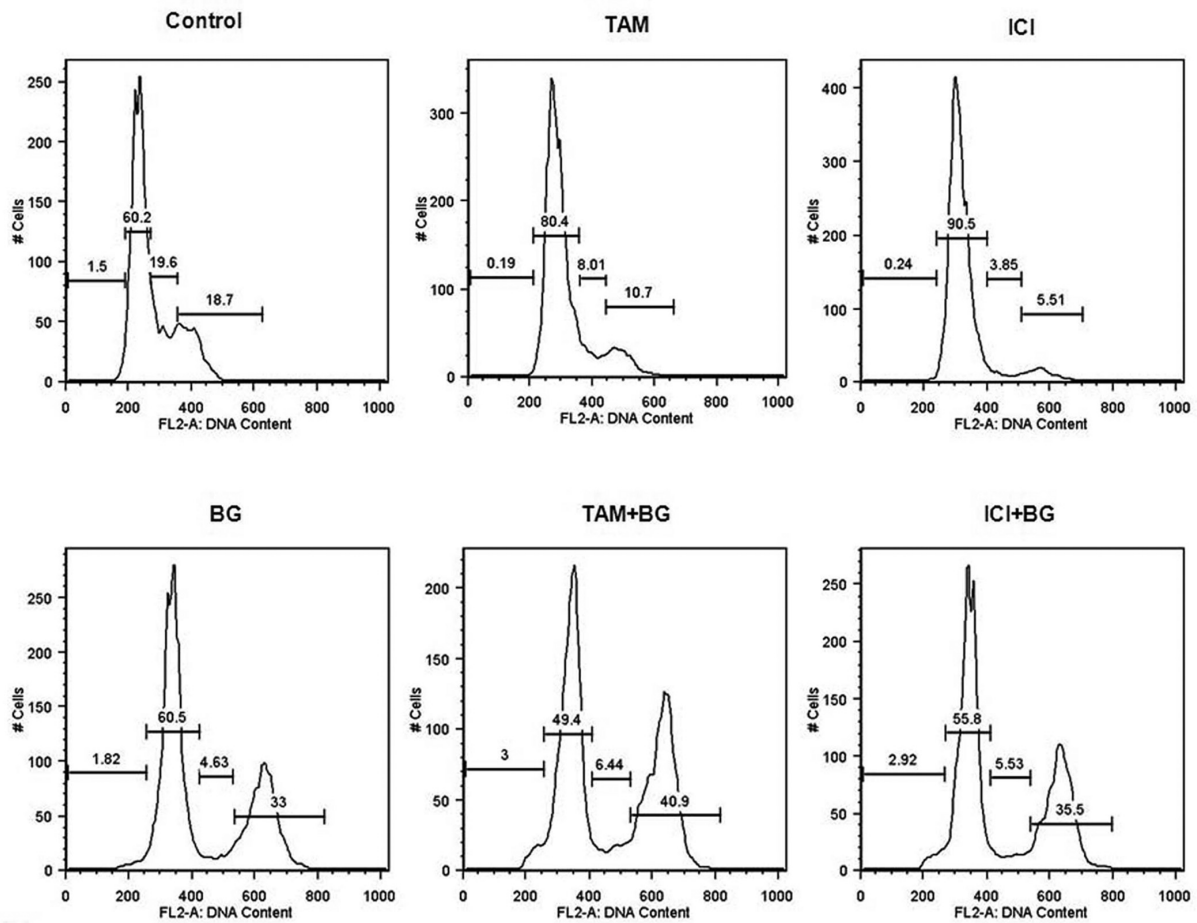

**Supplementary Figure S2.** Benzylguanine and combination therapy induces G2/M arrest. Tamoxifen-resistant MCF7 breast cancer cells were treated with BG (140  $\mu\text{mol/L}$ ) for 24 h before TAM or ICI was added for another 48 h before flow cytometry analysis was performed. BG (140  $\mu\text{mol/L}$ ) led to significant G2/M arrest (promoting cytostasis and cell death) which was further enhanced in the presence of combination therapy (TAM + BG/ICI + BG).
